## 1 **Title Page**

2 **Item generation for a new patient-reported outcome measure:** The non-traumatic anterior knee pain (AKP)-  
3 YOUTH scale

4 **Running Head:** Patient-reported outcome measure and non-traumatic anterior knee pain

5 Authors: Marie Germund Nielsen<sup>1,2a</sup>, Kristian Damgaard Lyng<sup>2,3a</sup>, Sinead Holden<sup>2,3,4</sup>, Simon Kristoffer  
6 Johansen<sup>2,3</sup>, Marinus Winters<sup>3</sup> and Michael Skovdal Rathleff<sup>2,3,5</sup>.

7

## 8 **Affiliations**

9 <sup>1</sup> Clinical Nursing Research Unit, Aalborg University Hospital, Aalborg, Denmark

10 <sup>2</sup> Department of Health Science and Technology, Faculty of Medicine, Aalborg University, Aalborg, Denmark

11 <sup>3</sup> Center for General Practice at Aalborg University, Aalborg, Denmark.

12 <sup>4</sup> School of Public Health, Physiotherapy and Sports Science, University College Dublin, Dublin, Ireland

13 <sup>5</sup> Department of Occupational Therapy and Physiotherapy, Aalborg University Hospital, Aalborg, Denmark.

14 <sup>a</sup> Shared first authorship.

15 Marie Germund Nielsen: [marie.nielsen@rn.dk](mailto:marie.nielsen@rn.dk), Kristian Damgaard Lyng: [klyng@dcm.aau.dk](mailto:klyng@dcm.aau.dk), Sinead Holden:  
16 [siho@hst.aau.dk](mailto:siho@hst.aau.dk), Simon Kristoffer Johansen: [skjohansen@dcm.aau.dk](mailto:skjohansen@dcm.aau.dk), Marinus Winters:  
17 [marinuswinters@hotmail.com](mailto:marinuswinters@hotmail.com), Michael Skovdal Rathleff: [misr@hst.aau.dk](mailto:misr@hst.aau.dk)

18 All authors have read and approved this manuscript.

19

## 20 **Conflict of interest and source of funding**

21 The project is financed by funds from Novo Nordisk (ID: 29962) and TrygFonden (ID: 118547). Otherwise, the  
22 authors have no conflicts to declare.

## 23 **Corresponding Author**

24 Kristian Damgaard Lyng, Department of Health Science and Technology, Faculty of Medicine, Aalborg  
25 University, Selma Lagerlöfs Vej 249, 9260 Gistrup, Denmark, Phone +45 30669439, E-mail:  
26 [klyng@dcm.aau.dk](mailto:klyng@dcm.aau.dk).

27

## 28 **Keywords**

29 Adolescents, Knee pain, Patient reported outcome measure.

## 30 **Competing interests**

31 None stated.

## 32 **Data availability statement**

33 Researchers interested in the data from the AKP-Youth scale study may contact the principal investigator, Prof.

34 Michael Skovdal Rathleff, [misr@hst.aau.dk](mailto:misr@hst.aau.dk).

**NOTE: This preprint reports new research that has not been certified by peer review and should not be used to guide clinical practice.**

35 **Question:** Which domains are important to develop a preliminary item bank for a new patient-  
36 reported outcome measure relating to adolescents with non-traumatic anterior knee pain?

37 **Design:** Multiple methods: semi-structured interviews,

38 **Participants:** Twenty-one adolescents with anterior knee pain participated in semi-structured  
39 interviews which explored their experience of living with knee pain. Following thematic  
40 analysis, we generated an item bank based on the domains which emerged from the impact  
41 their knee pain had on their daily life. Ten clinical experts provided input on the preliminary  
42 item bank via an online survey. Cognitive interviews were conducted using the think-aloud  
43 approach with ten adolescents to evaluate the comprehensibility and face validity of the items.

44 **Results:** From the interviews we identified four overarching domains where adolescents were  
45 impacted by their knee pain: knee symptoms, limitations in physical activity/sport, limitations  
46 in social activities, and emotional impact of pain. Eighteen items was initially developed and  
47 expanded to 23 following clinical expert input. The cognitive interviews with adolescents  
48 demonstrated that the items were comprehensive, understandable, and relevant for adolescents.

49 **Conclusion:** This study developed an item bank of 23 items. These spanned four domains of  
50 impact for adolescents with anterior knee pain. The items had good face validity and were  
51 deemed relevant and understandable for adolescents with knee pain. Further steps are needed  
52 to validate and reduce the items for the non-traumatic anterior knee pain (AKP)-YOUTH scale.

53

54

55

56

## 57 **Introduction**

58 Musculoskeletal pain is common in adolescents, affecting almost one in three (1,2). Knee pain  
59 is one of the most common pain types (3,4) and is associated with disability, low quality of  
60 life, and difficulties participating in physical activity, sport, and social activities (5–7). Several  
61 painful conditions are included under the definition of non-traumatic anterior knee pain. The  
62 most common conditions are Osgood Schlatter disease, patellofemoral pain, and Sinding-  
63 Larsen Johansson, which are associated with pain and functional impairments which often span  
64 months or even years (7–11).

65 Patient-reported outcomes are reports of patients' health conditions coming directly from the  
66 patients and are important to gain patients' perspectives on their symptoms and condition (12).  
67 Patient-reported outcome measures (PROMs) can either be generic (e.g., measures of quality  
68 of life that are designed for use across multiple conditions) or condition-specific PROMs,  
69 which are designed to capture changes in a specific condition (e.g., Knee Injury and  
70 Osteoarthritis Outcome Score (KOOS) (13)). No PROMs have been developed specifically for  
71 adolescents with non-traumatic anterior knee pain.

72 The PROMs currently used in clinical research on non-traumatic knee pain in adolescents (e.g.,  
73 KOOS, KOOS-Child and Pedi-IKDC) are not specifically developed for adolescents with non-  
74 traumatic anterior knee pain (13–15). These PROMs may not adequately capture the  
75 adolescent's experience and creates uncertainty in what is measured (16,17). This can lead to  
76 inaccuracies when estimating the effect of an intervention or the prognosis of the knee  
77 condition (18). The main objectives of this study were to identify domains and develop a  
78 preliminary item bank for adolescents with non-traumatic knee pain. This item bank should  
79 later contribute to the non-traumatic anterior knee pain (AKP)-YOUTH scale.

## 81 **Materials and methods**

### 82 **Design**

83 To identify domains of relevance for the AKP-YOUTH scale, we incorporated lived  
84 experiences from adolescents with anterior knee pain, clinical experts, and research on anterior  
85 knee pain which was mapped to the International Classification of Functioning, Disability and  
86 Health (ICF) model. The development consisted of the following steps (Figure 1):

- 87 1) Identification of domains of impact for adolescents with knee pain through semi-  
88 structured interviews with adolescents
- 89 2) Preliminary item bank formulation
- 90 3) Clinical expert input on identified domains and preliminary item bank
- 91 4) Cognitive interviews of adolescents using the think-aloud approach.
- 92 5) Translation of content

93 Data were processed and stored in accordance with the regulations of the General Data  
94 Protection Regulation (GDPR). Ethical approval by the local committee was applied for but  
95 was deemed exempt from full approval due to the low-risk nature of the study. Written  
96 informed consent was obtained from the participants (15 years of age or older) or their legal  
97 guardian(s) (if below 15 years).

98

99 **INSERT FIGURE 1 HERE: IDENTIFICATION PROCESS**

100

101

102

## 103 **Step 1: Identification of relevant domains through interviews**

104 To ensure domains included in an item bank reflected the lived experience of adolescents with  
105 non-traumatic anterior knee pain (content validity), we conducted qualitative semi-structured  
106 interviews with adolescents. An interview guide was designed by members of the steering  
107 group (Appendix 1) based on existing research, members experience with this patient  
108 population, and the ICF model (19). It consisted of open-ended questions, covering different  
109 aspects of adolescents' experience of living with knee pain, while exploring which parts of the  
110 experience the adolescents deemed important to improve. The interview guide was piloted on  
111 three adolescents with knee pain to ensure comprehensibility and incited deep descriptions  
112 from participants (20). The interview guide was iterated as new themes emerged from the  
113 interviews. Adolescents aged 10 to 19 years with any type of non-traumatic anterior knee pain  
114 for over three months were eligible for inclusion in the interviews. Adolescents with a traumatic  
115 origin of pain or any other origin of pain (e.g., systemic disease, tumour) and those who were  
116 not fluent in Danish were ineligible. McConaughy's recommendations for interviewing  
117 adolescents were used to ensure all necessary precautions were taken (21). The interviews  
118 lasted between 30 and 60 minutes. The interviews were conducted in person (n = 15) or over  
119 Microsoft Teams (n = 6). Parents were invited to be present during the interviews. All  
120 interviews were audio recorded and transcribed verbatim by the interviewer and two student  
121 assistants using NVivo 12 (NVivo qualitative data analysis software; QSR International Pty  
122 Ltd. Version 12, 2018). Data were analysed using the thematic text analysis approach described  
123 by Braun and Clarke (24), which included the following steps: familiarisation, coding,  
124 searching for themes, reviewing themes, defining, and naming themes, and writing up themes  
125 into a narrative form. To familiarise themselves with the raw data, the transcripts of the  
126 interviews were read multiple times by two coders. From this thematic coding, potential themes  
127 were categorized by one researcher via inductive interpretation. All potential themes were

128 summarised, combined, and presented to the rest of the steering group as potential domains  
129 and items. All themes were discussed, reviewed, and refined by the project group. As new  
130 themes were identified, the transcripts were reread to ensure the themes and their related  
131 domains were empirically grounded.

132

### 133 **Step 2: Preliminary item bank formulation based on identified domains of impact.**

134 Based on the results and identified themes from the interviews in step 1 and knowledge from  
135 the literature (8,22–24) on adolescent anterior knee pain, initial items were formulated using  
136 guidelines from Streiner et al (25). From the literature we used phrasing of items and response  
137 options from other questionnaires in the preliminary item bank (14,15,26). This was conducted  
138 by the study's steering group. The following criteria were used to generate preliminary items;  
139 the items should:

- 140 1) Be discriminatory; measure differences within the construct, important to the  
141 adolescent with non-traumatic anterior knee pain
- 142 2) Be linked to adolescents' knee condition
- 143 3) Be able to measure changes over time
- 144 4) Measure a present state (i.e., does not say something about what will happen/is expected  
145 to happen in the future)
- 146 5) Be applicable/relevant to all (>95%); all possible adolescents with knee pain should be  
147 able to score on the item (e.g., an item on playing football may not be appropriate as  
148 not all adolescents with knee pain engage in football regularly).
- 149 6) Each domain should include one construct

150 Preliminary items were as simple as possible (i.e., simplicity in phrasing, no jargon, no  
151 ambiguity, no double-barrelled questions, and no value-laden words) to ensure

152 understandability regardless of health literacy (25). The formulation of the preliminary items  
153 was an iterative process between the members of the steering group and was repeated until  
154 agreement. All decisions and changes to the items were discussed collaboratively within the  
155 steering group, which consisted of the authors who had clinical and research experience with  
156 anterior knee pain among adolescents.

157

### 158 **Step 3: Clinical expert input**

159 We aimed to incorporate input from clinical experts into the identification of the domains and  
160 preliminary items to ensure the item bank covered the important domains for this population.  
161 Surveys were conducted in English, developed, and sent through Research Electronic Data  
162 Capture tools (REDCap<sup>TM</sup>) hosted at Aalborg University (27,28). Some of the items, were  
163 created in Danish, and hence the steering group translated the items into English for the purpose  
164 of the survey. The participants were asked if the domains and items were adequately  
165 comprehensive. Participants were also asked if the item bank missed any domains, or items  
166 within domains. Participants were eligible to participate as experts if they had a minimum of 5  
167 years of experience with adolescents with knee pain and had been involved in research on knee  
168 pain (29). No domains or items were removed as this step was to provide input on phrasing and  
169 to identify any potential domains or items of relevance that had not yet been captured by the  
170 initial set of items.

171

### 172 **Step 4: Think-aloud exercise with adolescents.**

173 A think-aloud exercise was conducted with a researcher acting as ‘narrator’ (KDL) and  
174 included the assessment of setup, usability, comprehensibility, and face validity via reflection-  
175 in-action (30). To ensure that the wording of the item bank were applicable and readable to as

176 many 10-19 years as possible, we expanded the recruitment to include children and adolescents  
177 between 8-19 years. The think-aloud exercise was conducted online via Microsoft Teams using  
178 a process guide. Audio and video from the interviews were recorded (see Appendix 2 for think-  
179 aloud interview process) (31). Parents were allowed to sit next to the adolescent to replicate a  
180 situation in which adolescents would complete it with parents present. The adolescents received  
181 a link to the item bank and were asked to print it out prior to the think-aloud exercise. During  
182 the think-aloud exercise, the participants were asked to complete the items while reading and  
183 thinking out loud about the items and responses. The participants were instructed to say  
184 whatever came to their minds as they went through the items. This allowed the identification  
185 of any difficulties in understanding phrases or concepts. If the adolescents would stop or pause,  
186 the researcher would prompt (e.g., ‘why did you pause on this’) them to articulate their  
187 reflections while reading the items to identify any misunderstanding or confusion of each item.  
188 During all think-aloud exercises, the researcher collected field notes which were updated by  
189 reviewing the video recordings after the exercise to ensure nothing was overlooked (30).  
190 Sampling of participants was continued until saturation. We adjusted the items according to  
191 the responses on an ongoing basis. And transcripts from the think-aloud exercise were imported  
192 into Microsoft Word, analysed, and presented to the rest of the steering group for final  
193 interpretation. Reiterations of the item bank were discussed within the steering group and  
194 decisions were made by consensus.

195

#### 196 **Step 5: Translation of content**

197 All Danish content was translated through a dual-panel approach (32). The first panel consisted  
198 of the author group, consisting of five individuals (two physiotherapist, one nurse, one exercise  
199 scientist, one information specialist) fluent in Danish and English. Five were native Danish  
200 speakers, and one was a native English speaker. All independently translated the Danish all



201 study-derived content into English. The aim of their translation where to create translations that  
202 could be understood by the target population (adolescents with non-traumatic knee pain aged  
203 between 10-19 years old). The panel then synthesized and compared their translations with  
204 linguistic imprecisions, language- and cultural appropriation in mind. Through consensus, a  
205 final version was derived. Hereafter, a new panel consisting of four laypersons were established  
206 and this panel were instructed to review the final translation from the first panel. The second  
207 panel provided inputs to re-wording or re-phrasing of the translation. In cases where the item  
208 bank and responses were derived from other validated PROMS, no translation were performed,  
209 and the original formulation was kept. All translated material is presented in Appendix 8.

210

## 211 **RESULTS**

### 212 **Step 1: Identification of domains of relevance for adolescents with knee pain through** 213 **semi-structured interviews with adolescents**

214 Twenty-one adolescents with non-traumatic knee pain participated in the interviews to give  
215 their experience of living with knee pain. Detailed demographics are presented in Table 1. The  
216 thematic analysis revealed 12 domains. Summaries of each domain together with illustrative  
217 quotes, were discussed within the steering group and distilled into four overarching domains  
218 of importance. These were symptoms, limitations of physical activity, limitations in social  
219 activity, and the emotional impact of pain.

220

221 **INSERT TABLE 1 HERE: DEMOGRAPHICS OF STEP 1**

222

### 223 **Step 2: Preliminary item bank formulation based on expert (steering group)**

224 The steering group identified four key domains (symptoms, limitations in physical activity,  
225 limitations social activity and emotional impact of pain). A description of the topics after this  
226 stage is included in Appendix 3. Also, existing literature was used and where possible, phrasing  
227 or structure of phrasing of items and response options from existing questionnaires.  
228 Preliminary item formulations are included in Appendix 4.

### 229 **Step 3: Clinical expert input**

230 Eleven clinical experts responded to the online questionnaire (demographics and clinical  
231 experience are outlined in Table 2). The expert origins from the following countries: Australia  
232 1(9.1%), Denmark 3(27.3%), Ireland 1(9.1%), United Kingdom 3(27.3%) and USA 1(9.1%).  
233 Overall, the experts deemed the identified domains and preliminary items relevant and  
234 comprehensive for adolescents with anterior knee pain. The experts made suggestions for  
235 improvements in the phrasing of the included items. Some of the feedback pertained to overlap  
236 in items. Based on the clinical expert input, six items were added (Appendix 5). This was done  
237 to better capture the domain of physical activity and exercise (3 items) to better capture the  
238 general ability to be active and how this is influenced by knee pain. This was triangulated with  
239 the themes identified in the interviews with adolescents and based on this, additional items  
240 were added to ensure full comprehensiveness in the item bank. In addition, items were added  
241 for impact on sleep (symptoms domain), standing from prolonged sitting (limitations in  
242 activity), and difficulty kneeling (limitations in activity). The items added are listed in appendix  
243 5, and they correspond to items 3, 4, 5, 6, 8, and 13 in the questionnaire.

244

245 **INSERT TABLE 2 HERE: DEMOGRAPHICS OF STEP 3**

246

247

248 **Step 4: Think-aloud exercise with adolescents**

249 Cognitive interviews were undertaken on the final 23 items in a draft questionnaire (33). Ten  
250 adolescents (8 with non-traumatic anterior knee pain, and 2 were pain-free) participated in the  
251 think-aloud exercise. Demographics are presented in Table 3. Themes generated from think-  
252 aloud are presented in table 4. All participants were able to read and understand the  
253 formulations and response categories used in the think-aloud exercise. In the analysis we  
254 identified issues and incorporated these. In the first theme, *usability*, the adolescents expressed  
255 that REDCap was easy to use and only required little to no extra mental effort to navigate  
256 through the items. One participant highlighted the potential need for a read-aloud function for  
257 those with a reading-disability. Within the theme of *visibility*, the adolescents expressed that it  
258 was easy to recognise the intended meaning of the items and that the instructions on how to  
259 reply were clear. In the *understandability* theme, the adolescents highlighted several ideas for  
260 rephrasing items questions (see Appendix 6 for item formulation after think-aloud).  
261 Furthermore, most of the participants expressed difficulty in understanding the difference  
262 between severity and frequency related to two items. Despite a few proposed corrections from  
263 the participants, the adolescents expressed that the overall reading flow was good but  
264 highlighted that the flow could be improved if some of the questions were shortened. No action  
265 was taken as the overall impression was good and in general, all participants expressed that the  
266 content was both accurate and appropriate in terms of their own lived experience, and thereby  
267 the item list was considered acceptable and comprehensive.

268

269 **INSERT TABLE 3 HERE: DEMOGRAPHICS OF STEP 4**

270

271 **INSERT TABLE 4 HERE: THEMES GENERATED FROM THINK-ALLOUD**

272 **DISCUSSION**

273 We identified a preliminary set of items to be used in a condition-specific PROM for  
274 adolescents with non-traumatic knee pain. We combined multiple steps to ensure that the  
275 domains identified were of importance to adolescents, clinicians, and researchers. Our results  
276 from the cognitive interviews showed that the preliminary set of items had good face and  
277 content validity. The clinicians' additions to the domains emerged from a clinical rationale  
278 which are valuable for clinicians using the tool for treating adolescents. Several clinical trials  
279 have used PROMs for non-traumatic anterior knee pain (22,34) however none of them have  
280 been developed specifically for this population. The most frequently used PROMs are the  
281 KOOS and KOOS Child, the Anterior Knee Pain Scale, and the Pedi-IKDC (13–15,26). The  
282 KOOS child covers five domains: pain, other symptoms, function in daily living (ADL),  
283 function in sport and recreation (Sport/Rec), and knee-related quality of life (QOL) (14). The  
284 Anterior Knee Pain Scale covers pain, symptoms, and knee function domains, while the Pedi-  
285 IKDC covers three domains: symptoms, sports activity, and knee function (15,26). None of  
286 these PROMs were originally developed based on interviews with adolescents suffering from  
287 non-traumatic anterior knee pain. These PROMs are either physician-based, includes  
288 symptoms items not relevant to our population or developed without patient involvement. Our  
289 interviews with 21 adolescents revealed two domains of importance that are not included in the  
290 currently used PROMs. The domains missing in current PROMs are limitations in social  
291 activities (e.g., ability to do things with your friends) and the emotional impact of the pain (e.g.,  
292 how often you feel sad because of knee pain). This highlights the importance of engaging  
293 adolescents to ensure that PROMs captures domains of importance to them. Where possible,  
294 we used phrasing or structure of phrasing of items and response options from other  
295 questionnaires in the preliminary bank of items (14,15,26). This included frequency measures  
296 such as “Never”, “Rarely”, “Sometimes”, “Often”, and “Always”. Likert scales were used to

297 assess the degree of difficulty such as “Not at all difficult”, “A little bit difficult”, “Somewhat  
298 difficult”, “Very difficult”, and “Extremely difficult”. The aim of the response options was to  
299 make answering easy and comprehensible for adolescents and make sure we used (where  
300 possible) phrasing tested multiple times with this age group.

301

## 302 **Meaning of findings**

303 Our study introduces a new item bank for adolescence with non-traumatic anterior knee pain.  
304 Applying such items (and as a PROM in the future) can lead to better trials where researchers  
305 capture what is most important to the end-users. Previous cross-sectional research shows that  
306 Osgood Schlatter disease and Patellofemoral Pain (the two most common conditions of non-  
307 traumatic anterior knee pain have a significant impact on knee function, ADL, sports  
308 participation, quality of life, sleep, and emotional well-being in adolescents (8). However, these  
309 studies have been conducted using PROMs decided upon by researchers. Previous developed  
310 PROMs are not comprehensive and has not been proven relevant among adolescence. This  
311 means that we may not capture the full impact of these conditions on adolescents with non-  
312 traumatic knee pain. This has implications both for interpreting the results of trials as well as  
313 the design of trials to target domains of importance to the adolescents.

314

## 315 **Limitations**

316 We conducted the initial interviews in step 1 with children and adolescents from Denmark. It  
317 is unclear if our findings would have been different if adolescents were from other countries  
318 where physical activity patterns may be different. As an example, problems with bicycling  
319 were identified as an important domain in our interviews. In countries where adolescents do  
320 not bike regularly, this question may be less relevant. It is crucial that future adaptations cover

321 the cultural differences that might exist. It could have been a strength if we adolescents were  
322 also involved in the item development (e.g., through workshops). However, the content validity  
323 for adolescents is ensured by the findings from the interviews and think-aloud exercises. We  
324 aimed to include children and adolescents with various forms of non-traumatic anterior knee  
325 pain to ensure that a potential future PROM would be suitable for all types of non-traumatic  
326 anterior knee pain between the age of 10 and 19 years of age. Therefore, it is unclear if there  
327 are domains and items specifically relevant for specific knee conditions within the broader  
328 group of adolescents with non-traumatic anterior knee pain. We conducted the think-aloud  
329 exercise online due to COVID-19 restrictions. This method made it easy and accessible for  
330 adolescents across Denmark to participate, but it is unclear if it affected the adolescents during  
331 the think-aloud exercise. We used a pragmatic Danish-English translation process, which might  
332 have affected our contributions/alterations to the items during the development. Three of the  
333 items (jumping, biking, running) may not be relevant to all adolescents. Future studies need to  
334 test the relevance of these items outside a Danish context.

335

### 336 **Implications and future research**

337 Our preliminary item bank needs further testing in larger groups to test both validity, reliability  
338 and responsiveness before usage in research and clinical practice (35). Developing a valid  
339 PROM will provide health professionals understand the impact across domains of importance  
340 to adolescents and inform the treatment and progress of adolescents with non-traumatic anterior  
341 knee pain.

342

343

344

345 **Conclusion**

346 A preliminary item bank was developed with inputs from adolescents with non-traumatic  
347 anterior knee pain, and clinical experts. The item bank revealed items involving  
348 biopsychosocial aspects and items not previously covered by other PROMs for adolescent knee  
349 pain. Further studies is needed to ensure that the most reliable and valid items has been  
350 identified prior to implementation in clinical practice and research.

351

352 **Acknowledgements**

353 The authors would like to thank the expert clinicians, who provided valuable input to the  
354 development of the PROM. Additionally, the authors would like to thank all the participants  
355 including adolescents, parents, and clinicians who participated in the study. Finally, thank you  
356 to Rasmus Sloth Hoffman for his contribution to designing the study and acquisition of data.

357

358 **Declaration of generative AI in scientific writing**

359 All authors declare that no artificial intelligent technology was used in any part of this study.

360

361

362

363

364

365

366

367 **References**

- 368 1. Keeratisiroj O, Siritaratiwat W. Prevalence of self-reported musculoskeletal pain  
369 symptoms among school-age adolescents: age and sex differences. *Scand J Pain*.  
370 2018;18(2):273–80.
- 371 2. Kamper SJ, Henschke N, Hestbaek L, Dunn KM, Williams CM. Musculoskeletal pain in  
372 children and adolescents. *Braz J Phys Ther*. 2016;20(AHEAD):0–0.
- 373 3. Rathleff MS, Roos EM, Olesen JL, Rasmussen S. High prevalence of daily and multi-site  
374 pain – a cross-sectional population-based study among 3000 Danish adolescents. *Bmc*  
375 *Pediatr*. 2013;13(1):191.
- 376 4. King S, Chambers CT, Huguet A, MacNevin RC, McGrath PJ, Parker L, et al. The  
377 epidemiology of chronic pain in children and adolescents revisited; A systematic  
378 review. *Pain*. 2011;152(12):2729–38.
- 379 5. Rathleff MS, Rathleff CR, Olesen JL, Rasmussen S, Roos EM. Is Knee Pain During  
380 Adolescence a Self-limiting Condition? *Am J Sports Medicine*. 2016;44(5):1165–71.
- 381 6. Rathleff MS, Roos EM, Olesen JL, Rasmussen S, Arendt-Nielsen L. Lower Mechanical  
382 Pressure Pain Thresholds in Female Adolescents With Patellofemoral Pain Syndrome. *J*  
383 *Orthop Sport Phys*. 2013;43(6):414–21.
- 384 7. Guldhammer C, Rathleff MS, Jensen HP, Holden S. Long-term Prognosis and Impact of  
385 Osgood-Schlatter Disease 4 Years After Diagnosis: A Retrospective Study. *Orthop J Sports*  
386 *Medicine*. 2019;7(10):2325967119878136.
- 387 8. Rathleff MS, Winiarski L, Krommes K, Graven-Nielsen T, Hölmich P, Olesen JL, et al.  
388 Pain, Sports Participation, and Physical Function in Adolescents With Patellofemoral Pain  
389 and Osgood-Schlatter Disease: A Matched Cross-sectional Study. *J Orthop Sport Phys*.  
390 2020;50(3):149–57.
- 391 9. Rathleff MS, Holden S, Straszek CL, Olesen JL, Jensen MB, Roos EM. Five-year  
392 prognosis and impact of adolescent knee pain: a prospective population-based cohort study of  
393 504 adolescents in Denmark. *Bmj Open*. 2019;9(5):e024113.
- 394 10. Holden S, Olesen JL, Winiarski LM, Krommes K, Thorborg K, Hölmich P, et al. Is the  
395 Prognosis of Osgood-Schlatter Poorer Than Anticipated? A Prospective Cohort Study With  
396 24-Month Follow-up. *Orthop J Sports Medicine*. 2021;9(8):23259671211022240.
- 397 11. Holden S, Roos EM, Straszek CL, Olesen JL, Jensen MB, Graven-Nielsen T, et al.  
398 Prognosis and transition of multi-site pain during the course of 5 years: Results of knee pain  
399 and function from a prospective cohort study among 756 adolescents. *Plos One*.  
400 2021;16(5):e0250415.
- 401 12. Weldring T, Smith SMS. Patient-Reported Outcomes (PROs) and Patient-Reported  
402 Outcome Measures (PROMs). *Heal Serv Insights*. 2013;6:HSI.S11093.



- 403 13. Roos EM, Roos HP, Lohmander LS, Ekdahl C, Beynnon BD. Knee Injury and  
404 Osteoarthritis Outcome Score (KOOS)—Development of a Self-Administered Outcome  
405 Measure. *J Orthop Sport Phys*. 1998;28(2):88–96.
- 406 14. Örtqvist M, Roos EM, Broström EW, Janarv PM, Iversen MD. Development of the Knee  
407 Injury and Osteoarthritis Outcome Score for Children (KOOS-Child). *Acta Orthop*.  
408 2012;83(6):666–73.
- 409 15. Nasreddine AY, Connell PL, Kalish LA, Nelson S, Iversen MD, Anderson AF, et al. The  
410 Pediatric International Knee Documentation Committee (Pedi-IKDC) Subjective Knee  
411 Evaluation Form: Normative Data. *Am J Sports Medicine*. 2017;45(3):527–34.
- 412 16. Anker SD, Agewall S, Borggrefe M, Calvert M, Caro JJ, Cowie MR, et al. The  
413 importance of patient-reported outcomes: a call for their comprehensive integration in  
414 cardiovascular clinical trials. *Eur Heart J*. 2014;35(30):2001–9.
- 415 17. Makrinioti H, Bush A, Griffiths C. What are patient-reported outcomes and why they are  
416 important: improving studies of preschool wheeze. *Archives Dis Child - Educ Pract Ed*.  
417 2020;105(3):185–8.
- 418 18. Kluzek S, Dean B, Wartolowska KA. Patient-reported outcome measures (PROMs) as  
419 proof of treatment efficacy. *Bmj Evidence-based Medicine*. 2022;27(3):153–5.
- 420 19. International classification of functioning, disability, and health : ICF [Internet]. Version  
421 1.0. Geneva : World Health Organization, [2001] ©2001; Available from:  
422 <https://search.library.wisc.edu/catalog/999977181002121>
- 423 20. Kvale S, Brinkmann S. Interviews: Learning the craft of qualitative research interviewing.  
424 3. edition. Thousand Oaks, Calif.: Sage Publications; 2014. xviii, 405 pages p.
- 425 21. McConaughy S. Clinical interviews for children and adolescents : assessment to  
426 intervention. New York: Guilford Press; 2013. xv, 272 s. p.
- 427 22. Rathleff MS, Graven-Nielsen T, Hölmich P, Winiarski L, Krommes K, Holden S, et al.  
428 Activity Modification and Load Management of Adolescents With Patellofemoral Pain: A  
429 Prospective Intervention Study Including 151 Adolescents. *Am J Sports Medicine*.  
430 2019;47(7):1629–37.
- 431 23. Winters M, Holden S, Lura CB, Welton NJ, Caldwell DM, Vicenzino BT, et al.  
432 Comparative effectiveness of treatments for patellofemoral pain: a living systematic review  
433 with network meta-analysis. *Brit J Sport Med*. 2021;55(7):369–77.
- 434 24. Johansen SK, Holden S, Pourbordbari N, Jensen MB, Thomsen JL, Rathleff MS.  
435 PAINSTORIES – Exploring the temporal developments in the challenges, barriers, and self-  
436 management needs of adolescents with longstanding knee pain: A qualitative, retrospective  
437 interview study with young adults experiencing knee pain since adolescence. *J Pain*. 2021;
- 438 25. Streiner DL, Norman GR, Cairney J. Health measurement scales: A practical guide to  
439 their development and use. 5th edition. Press OU, editor. Oxford University Press; 2015.

- 440 26. Kujala UM, Jaakkola LH, Koskinen SK, Taimela S, Hurme M, Nelimarkka O. Scoring of  
441 patellofemoral disorders. *Arthrosc J Arthrosc Relat Surg.* 1993;9(2):159–63.
- 442 27. Harris PA, Taylor R, Thielke R, Payne J, Gonzalez N, Conde JG. Research electronic  
443 data capture (REDCap)—A metadata-driven methodology and workflow process for  
444 providing translational research informatics support. *J Biomed Inform.* 2009;42(2):377–81.
- 445 28. Harris PA, Taylor R, Minor BL, Elliott V, Fernandez M, O’Neal L, et al. The REDCap  
446 Consortium: Building an International Community of Software Platform Partners. *J Biomed*  
447 *Inform.* 2019;95:103208.
- 448 29. Barton CJ, Rathleff MS. ‘Managing My Patellofemoral Pain’: the creation of an  
449 education leaflet for patients. *Bmj Open Sport Exerc Medicine.* 2016;2(1):e000086.
- 450 30. Burbach B, Barnason S, Thompson SA. Using “Think Aloud” to Capture Clinical  
451 Reasoning during Patient Simulation. *Int J Nurs Educ Scholarsh.* 2015;12(1):1–7.
- 452 31. Lundgrén-Laine H, Salanterä S. Think-Aloud Technique and Protocol Analysis in  
453 Clinical Decision-Making Research. *Qual Health Res.* 2010;20(4):565–75.
- 454 32. Swaine-Verdier A, Doward LC, Hagell P, Thorsen H, McKenna SP. Adapting Quality of  
455 Life Instruments. *Value Health.* 2004;7:S27–30.
- 456 33. Wolcott MD, Lobczowski NG. Using cognitive interviews and think-aloud protocols to  
457 understand thought processes. *Curr Pharm Teach Learn.* 2021;13(2):181–8.
- 458 34. Rathleff MS, Roos EM, Olesen JL, Rasmussen S. Exercise during school hours when  
459 added to patient education improves outcome for 2 years in adolescent patellofemoral pain: a  
460 cluster randomised trial. *Brit J Sport Med.* 2015;49(6):406.
- 461 35. Comins JD, Brodersen J, Siersma V, Jensen J, Hansen CF, Krogsgaard MR. How to  
462 develop a condition-specific PROM. *Scand J Med Sci Spor.* 2021;31(6):1216–24.
- 463

## Figures

**Figure 1: DEVELOPMENT PROCESS OF THE AKP-YOUTH PROM**

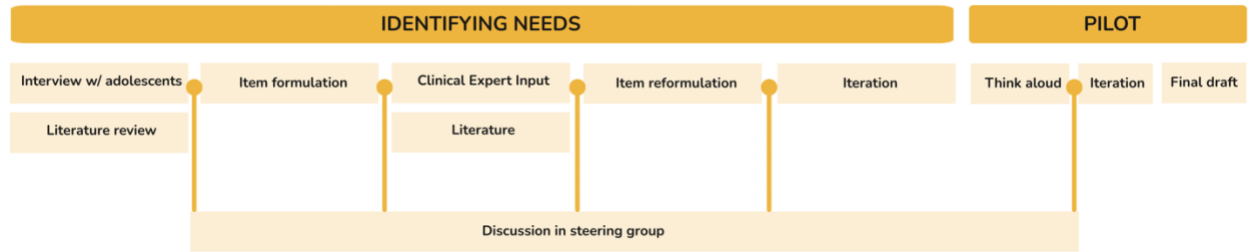

**Table 1: DEMOGRAPHICS OF PARTICIPANTS IN STEP 1**

| <b>Category</b>                                       |                                    |
|-------------------------------------------------------|------------------------------------|
| <b>No. of participants (n)</b>                        | 21                                 |
| <b>Age in years, median (range)</b>                   | 12 (10-18)                         |
| <b>Sex (female, %)</b>                                | n = 12, 57.1%                      |
| <b>Height in cm, median (range)</b>                   | 150 (137-176)                      |
| <b>Weight in kg, median (range)</b>                   | 47 (37-66)                         |
| <b>Diagnosis (n)</b>                                  | PFP = 13, OSD = 6, SL = 1, RK = 1. |
| <b>Duration of symptoms in months, median (range)</b> | 12 (3-48)                          |
| <b>Sports Activity (Yes, n/n)</b>                     | 19/21                              |
|                                                       |                                    |

**Abbreviations:** PFP = Patellofemoral Pain, OSD = Osgood Schlatter, SL = Sinding-Larsson, RK = Runner's Knee

**Table 2: DEMOGRAPHICS OF PARTICIPANTS FOR STEP 3**

|                                                |             |
|------------------------------------------------|-------------|
| <b>Response rate</b>                           | 11/14 (78%) |
| <b>Sex (%female)</b>                           | 30%         |
| <b>Age in years (mean (SD))*</b>               | 44(8)       |
| <b>Healthcare profession</b>                   |             |
| Sports medicine physician                      | 2 (18.2%)   |
| Physiotherapist/physical therapist             | 8 (72.7%)   |
| Orthopaedic surgeon                            | 1 (9.1%)    |
| <b>Country</b>                                 |             |
| Australia                                      | 1 (9.1%)    |
| Denmark                                        | 3 (27.3%)   |
| Ireland                                        | 1 (9.1%)    |
| United Kingdom                                 | 3 (27.3%)   |
| USA                                            | 1 (9.1%)    |
| <b>Cases per month of adolescent knee pain</b> |             |
| Between 1 and 4                                |             |
| Between 5 and 10                               | 2 (18.2%)   |
| Between 11 and 15                              | 6 (54.5%)   |
| More than 16                                   | 1 (9.1%)    |
|                                                | 2 (18.2%)   |
| <b>Years' experience</b>                       |             |
| Between 5 and 10                               | 6 (54.5%)   |
| Between 11 and 15                              | 5 (45.5%)   |
| <b>Academic qualification</b>                  |             |
| Bachelor                                       | 1 (9.1%)    |
| Master                                         | 3 (27.3%)   |
| PhD                                            | 7 (63.6%)   |

\*Missing data for N = 1 participant on age

**Table 3: DEMOGRAPHICS OF PARTICIPANTS STEP 4**

| <b>Category</b>                     |                                 |
|-------------------------------------|---------------------------------|
| <b>No. of participants (n)</b>      | 10                              |
| <b>Age in years, median (range)</b> | 11.5 (8-17)                     |
| <b>Sex (female, %)</b>              | n = 6, 60%                      |
| <b>Height in cm, median (range)</b> | 151.5 (140-178)                 |
| <b>Weight in kg, median (range)</b> | 41.5 (27-62)                    |
| <b>Diagnosis (n)</b>                | 6 = OSD, 2 = PFP, 2 = pain-free |
| <b>Sports Activity (Yes, n/n)</b>   | 10/10                           |
|                                     |                                 |

**Abbreviations:** PFP = Patellofemoral Pain, OSD = Osgood Schlatter,

**TABLE 4: THEMES GENERATED FROM THINK-ALOUD**

| <b>Theme</b>             | <b>Description</b>                                                                      |
|--------------------------|-----------------------------------------------------------------------------------------|
| <i>Usability</i>         | Practical use of the items, including time, navigation, clicks and mental effort.       |
| <i>Visibility</i>        | Level of ease to recognize the key messages and instructions given in the questionnaire |
| <i>Content</i>           | Accuracy and appropriateness of content included in the questionnaire                   |
| <i>Understandability</i> | Understandability and meaning of words used in the questionnaire                        |
| <i>Flow</i>              | Ability to navigate through each category and general reading flow of questionnaire     |
| <i>Acceptability</i>     | General accept of the relevancy of the overall questionnaire                            |
